# Supplementary material
Source: HighWire-hosted journal article supplement (https://diabetes.diabetesjournals.org/content/suppl/2008/11/25/db07-0630)
Supplement: Supplementary_Figure___legend.pdf [file Supplementary_Figure___legend.pdf]

Supplementary Figure 1

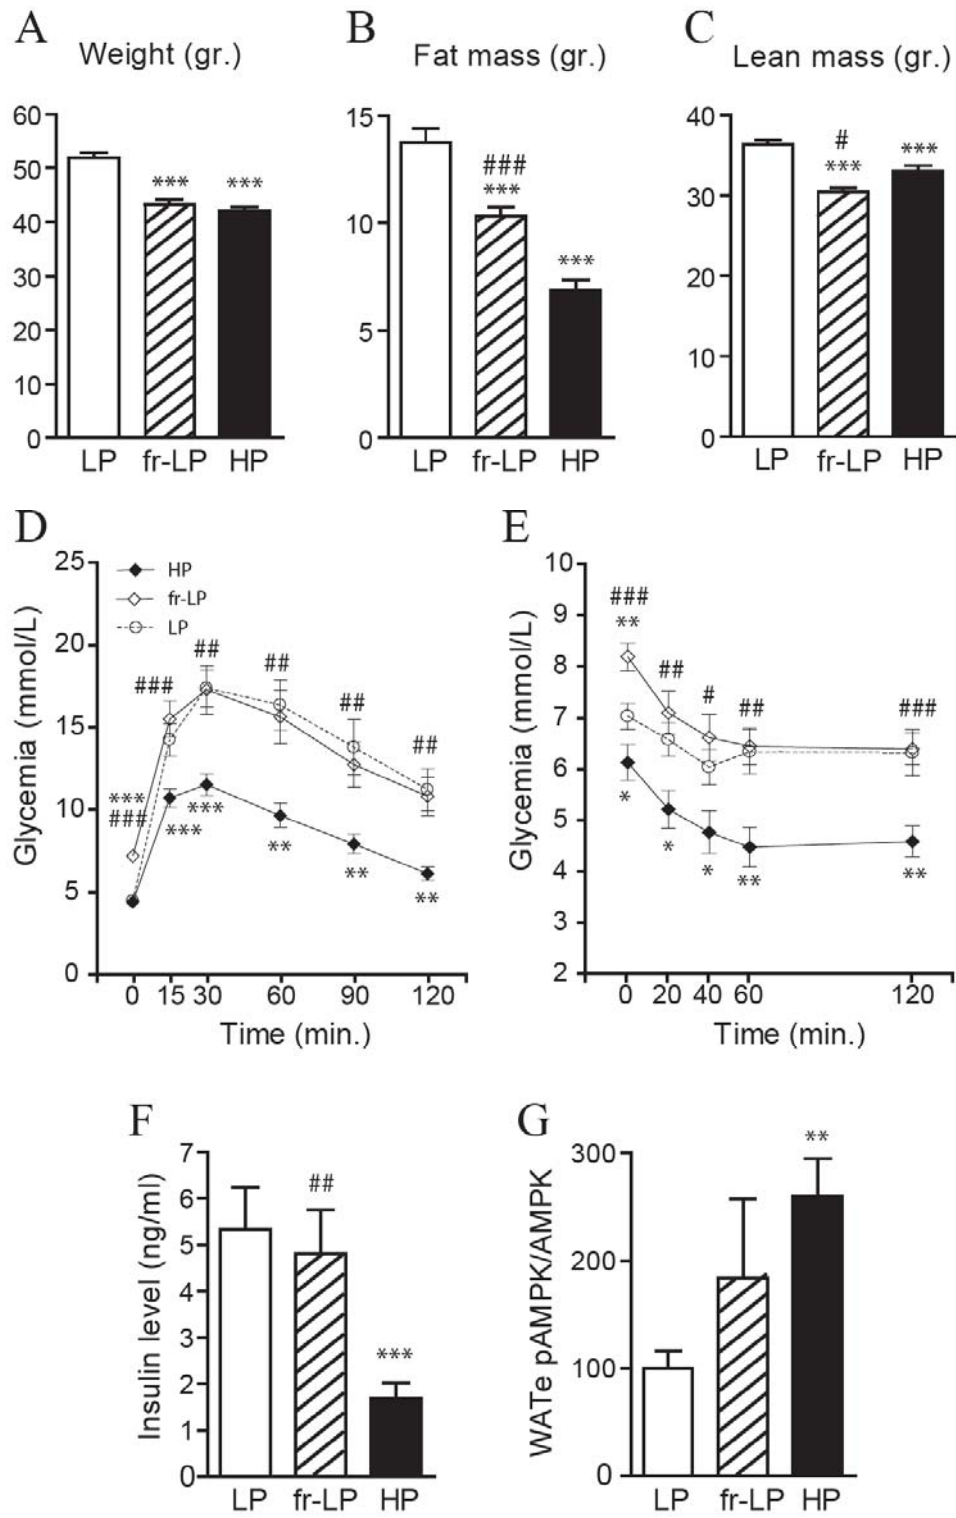

### **Supplementary Figure 1. Phytoestrogens but not leanness activate the AMPK**

For weight-match animals, male CD-1 mice were maintained on the LP diet all life long but at weaning age (28 days), the diet was restricted to reach ~80% of what classical LP animals eat so that total body weight remained similar to HP mice.

(A) Weight is decreased in fed restricted LP (fr-LP) and HP mice compared to LP; and is equivalent between fr-LP and HP mice. (B) Fat and (C) lean mass as measured by DEXA analysis differs in fr-LP and HP mice. Blood glucose levels during (D) GTT or (E) ITT are not improved in fr-LP animals compared to LP mice (n=13-15/group). (F) Serum insulin levels are not improved in fr-LP mice compared to LP. (G) pAMPK/AMPK ratio is not significantly improved in fr-LP mice compared to LP. Open dots or white bars represent LP animals, grey bars represent fr-LP animals and black bars or black diamonds represent HP animals. Results are mean  $\pm$  SEM (n=12-14/ group), \*p<0.05, \*\*p<0.01, \*\*\*p<0.001 versus LP. #p<0.05, ##p<0.01, ###p<0.001 versus HP.
